# Supplementary material for: Efficient Immune Shield: Biomimetic Nanovaccine of Acinetobacter Baumannii Recombinant Outer Membrane Protein W
Source: Research Square preprint supplement (doi:10.21203/rs.3.rs-5642310/v1), 2024-12-20
Supplement: Supplementary file 1 [file 42aeb2449c532b3238e4b0d9.docx]

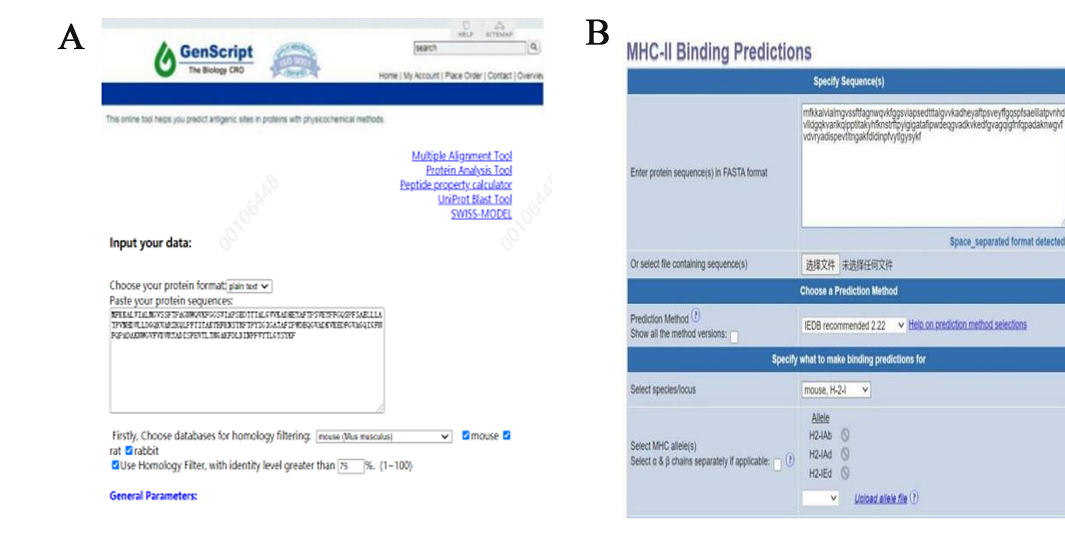


**Fig. S1** Home pages the platforms for B-cell epitope prediction by the OptimumAntigenTM Design Tool (A) and T-cell epitope prediction by IEDB (B).


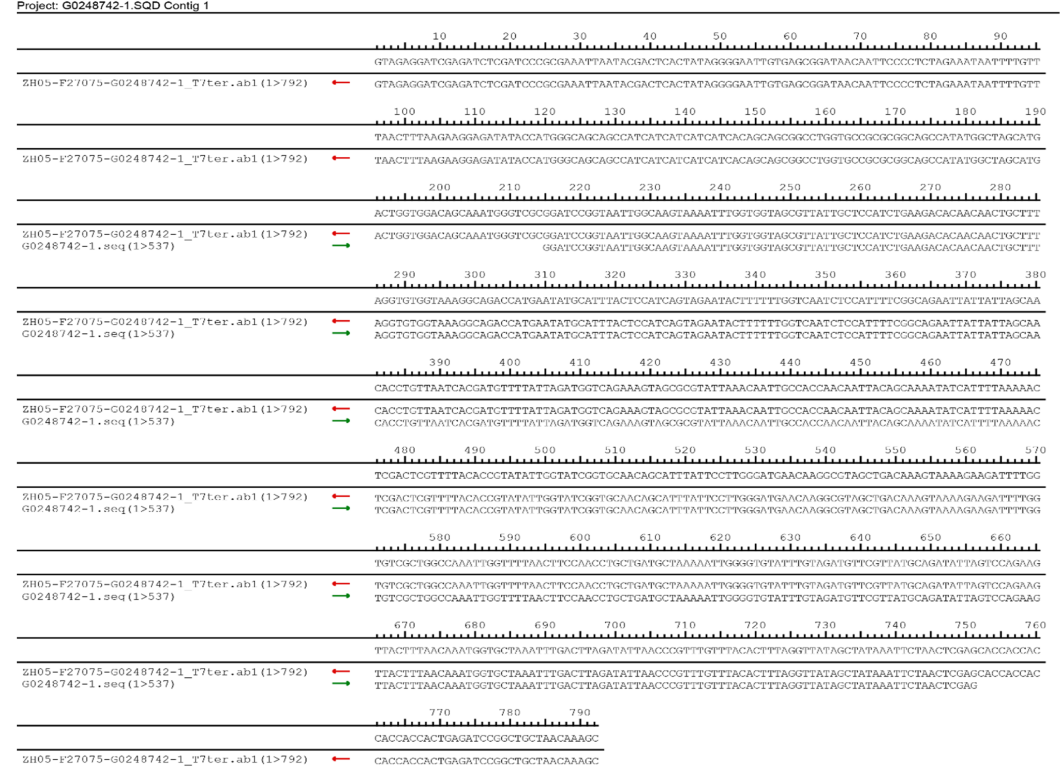


**Fig. S2** pET-28a-OmpW sequencing.


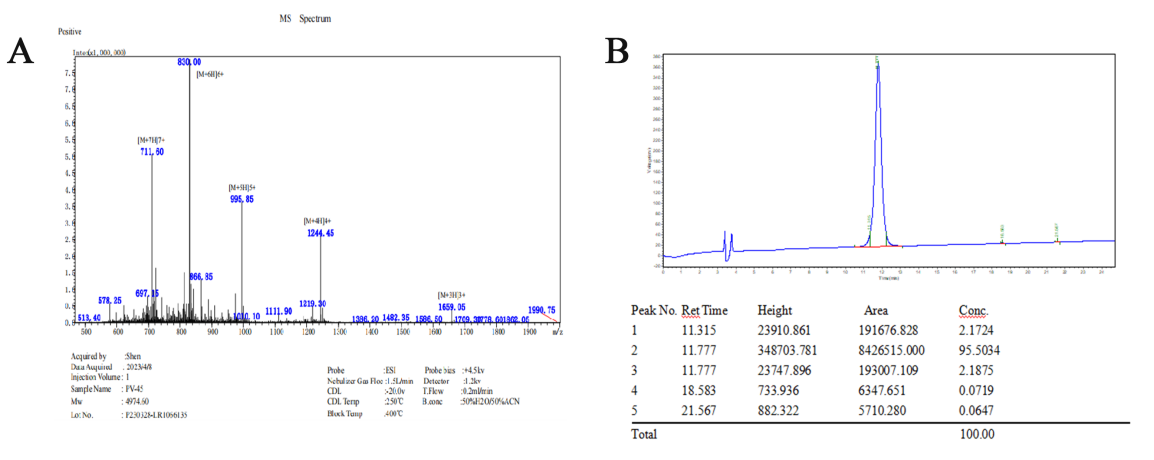


**Fig. S3** Mass spectrometry (A) and liquid chromatography (B) of the multiepitope peptide rOmpW.


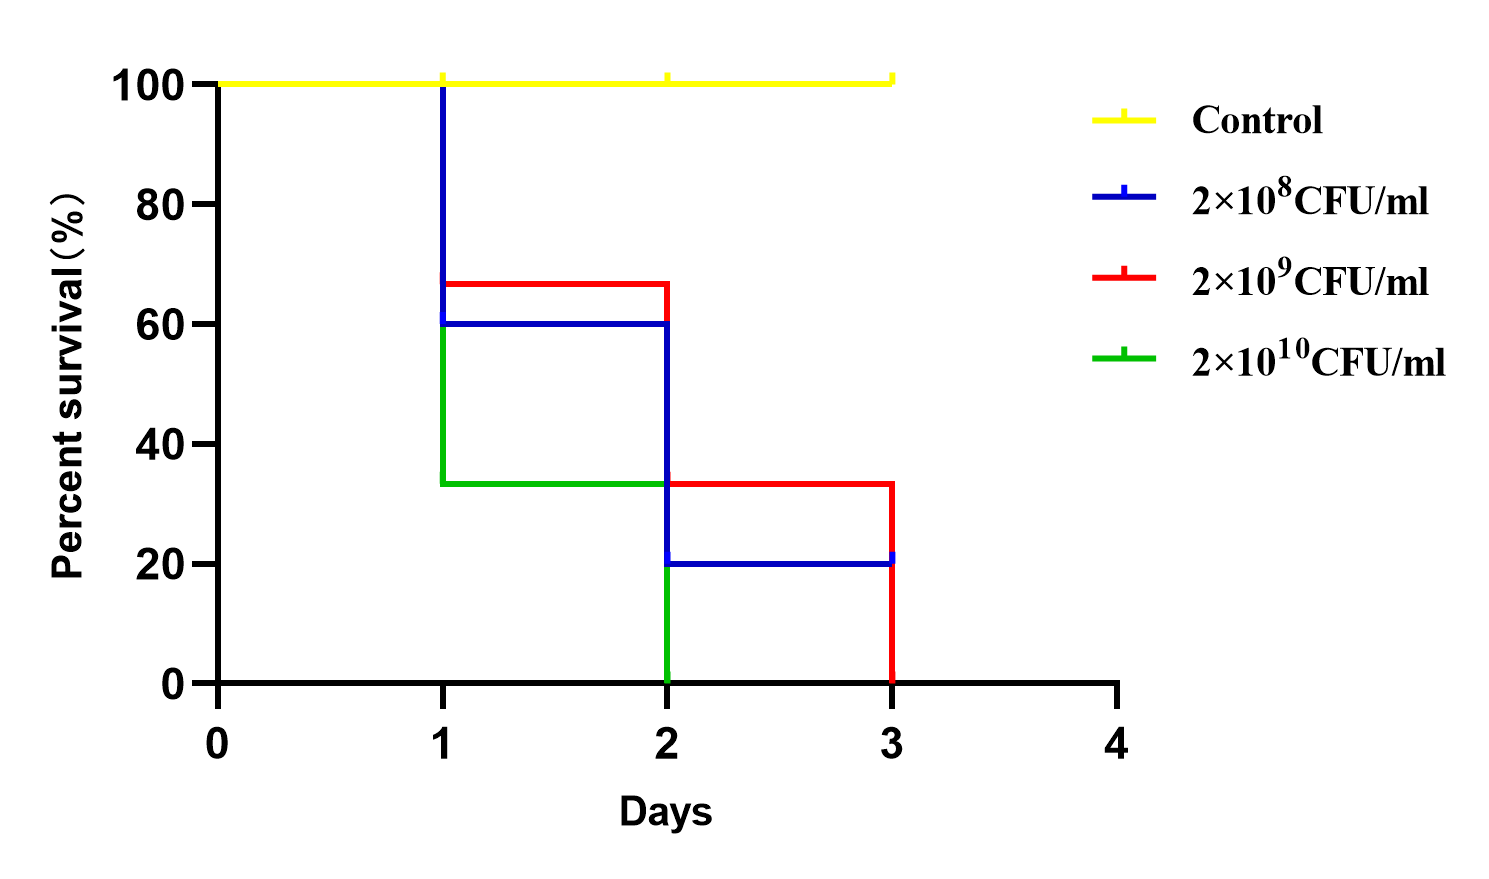


**Fig. S4** Assessment of the lethal dose of *A. baumannii* ATCC17978.


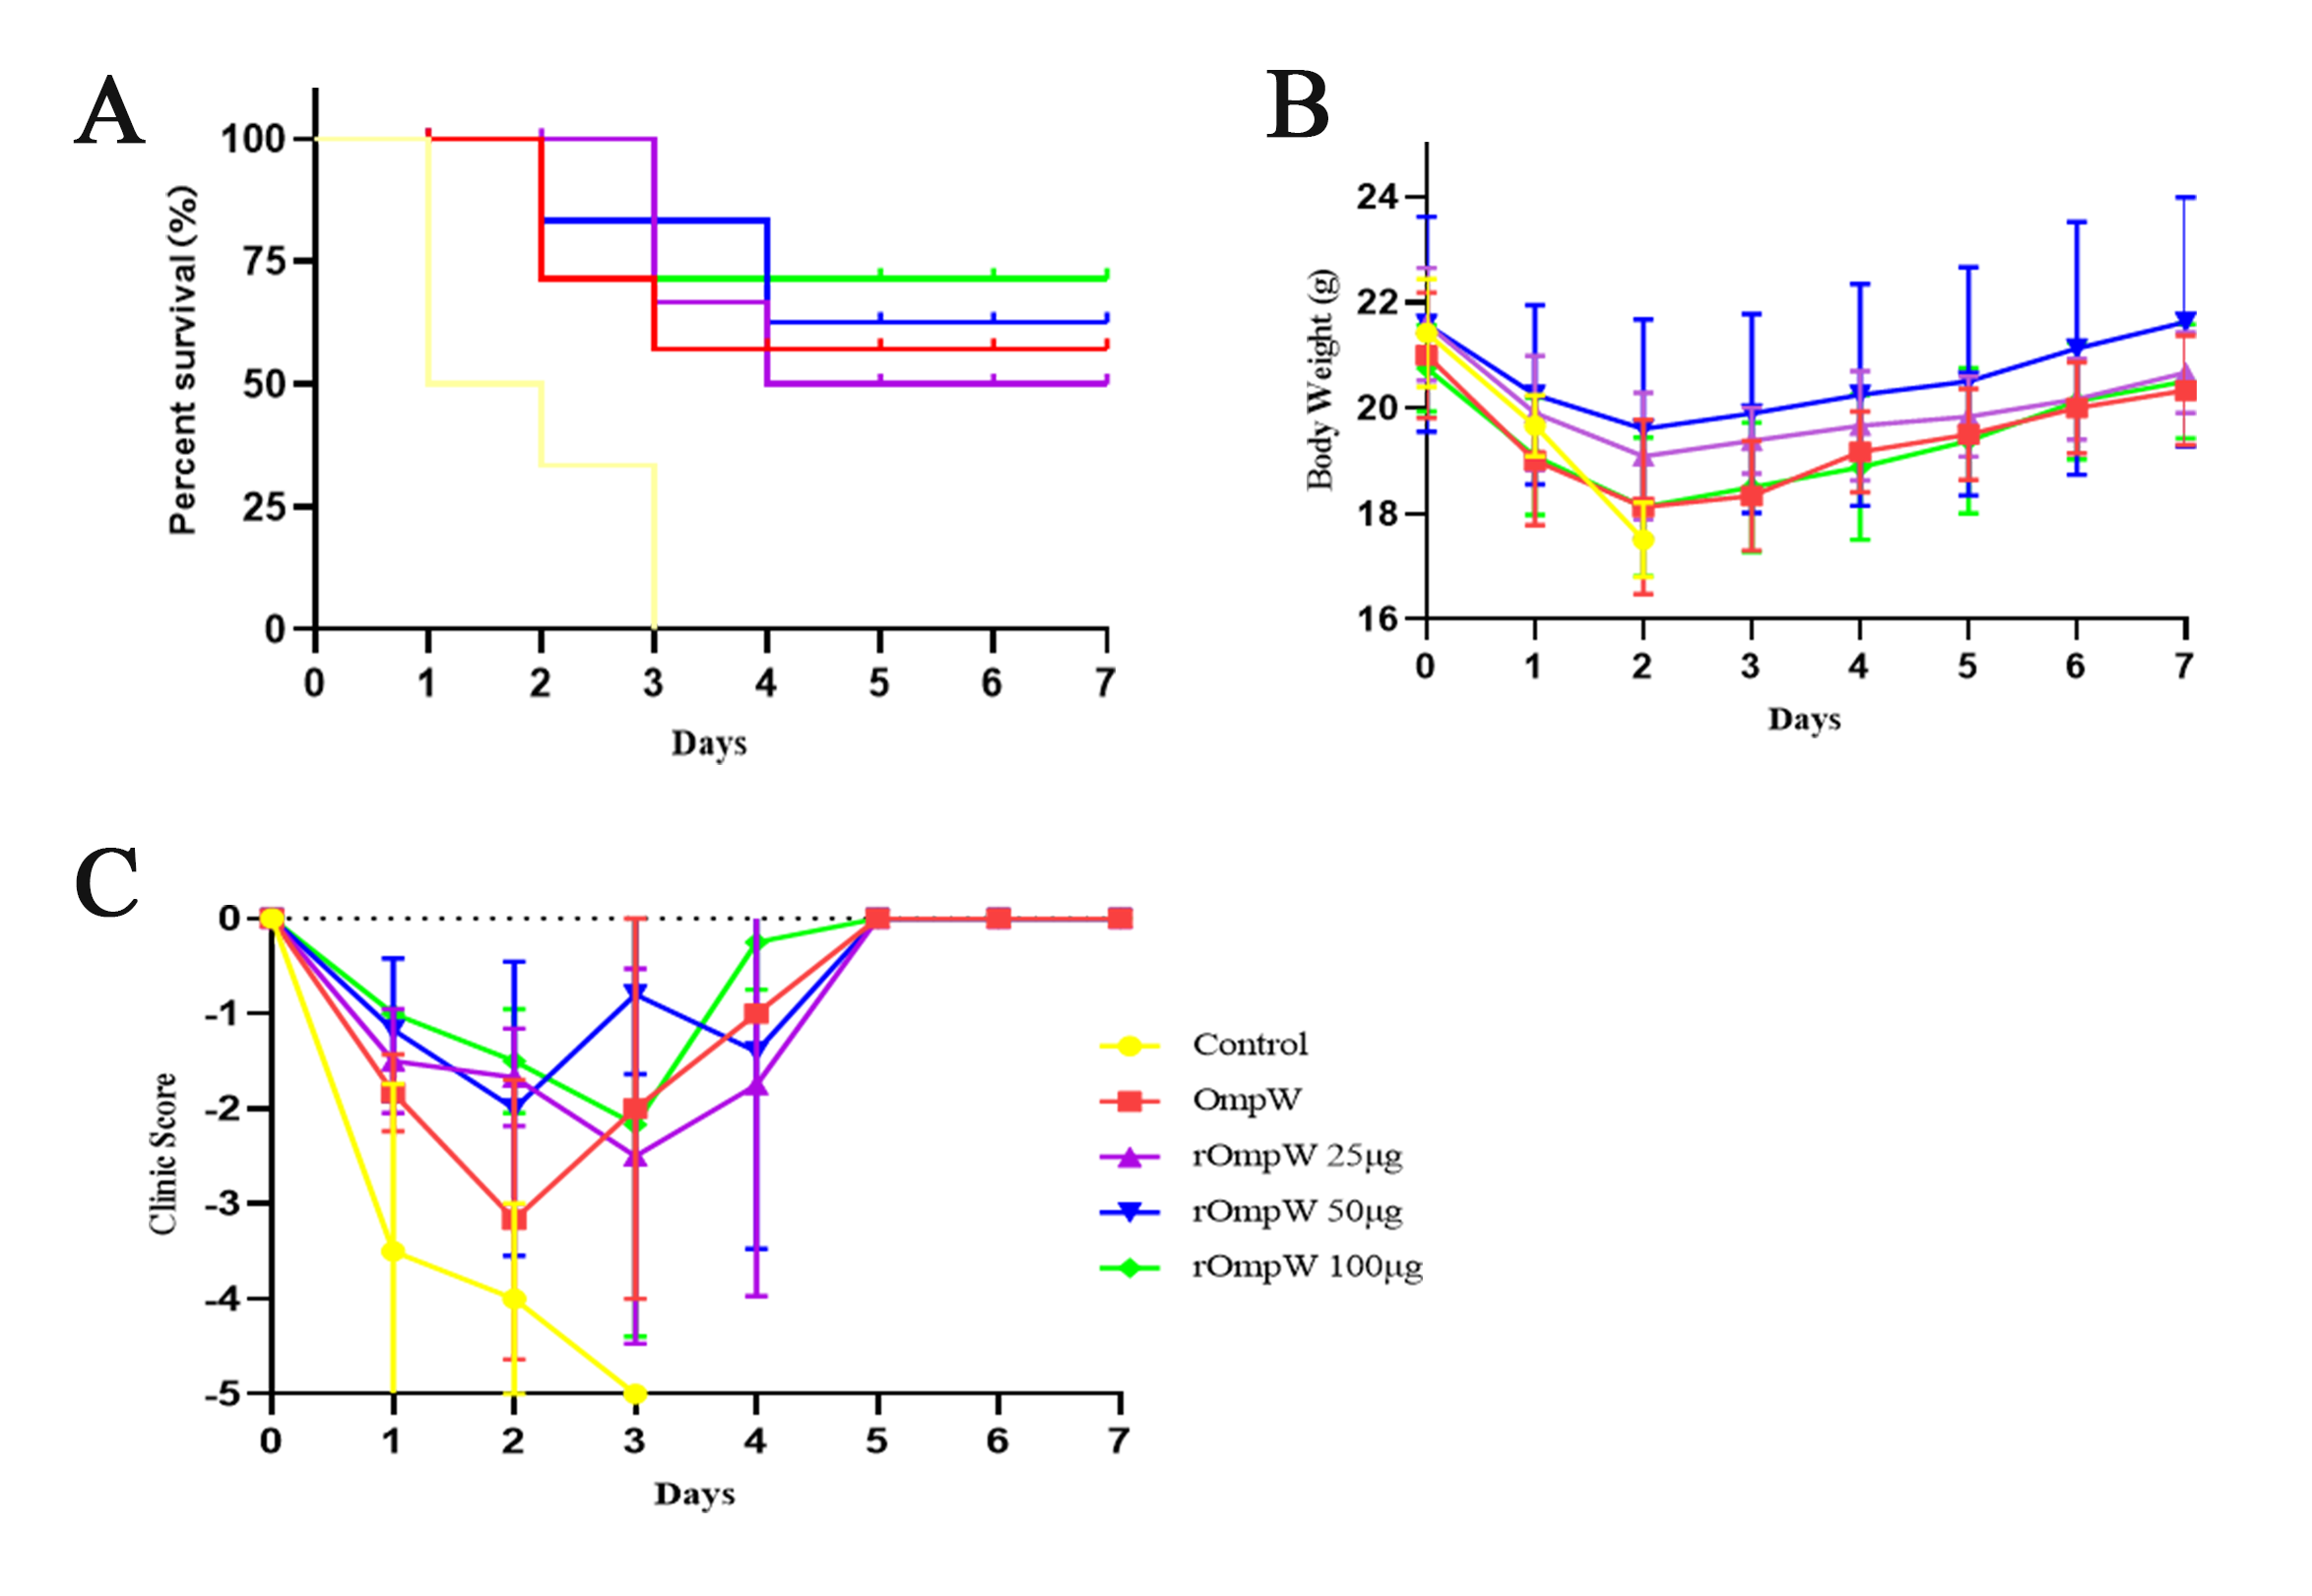


**Fig. S5** Survival rates (A), body weight changes (B) and clinical scores (C) each day after *A. baumannii* challenge.


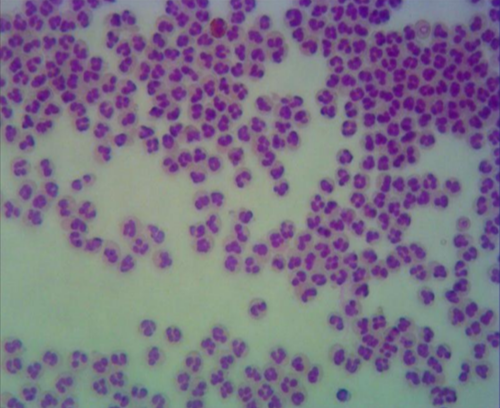


**Fig. S6** Human peripheral blood neutrophils.


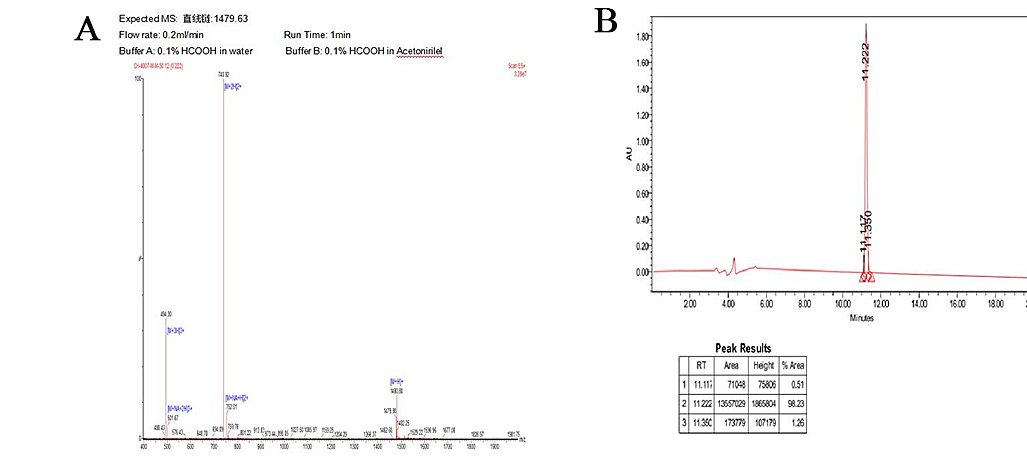


**Fig. S7** Mass spectrometry(A) and liquid chromatography(B) of DCpep.


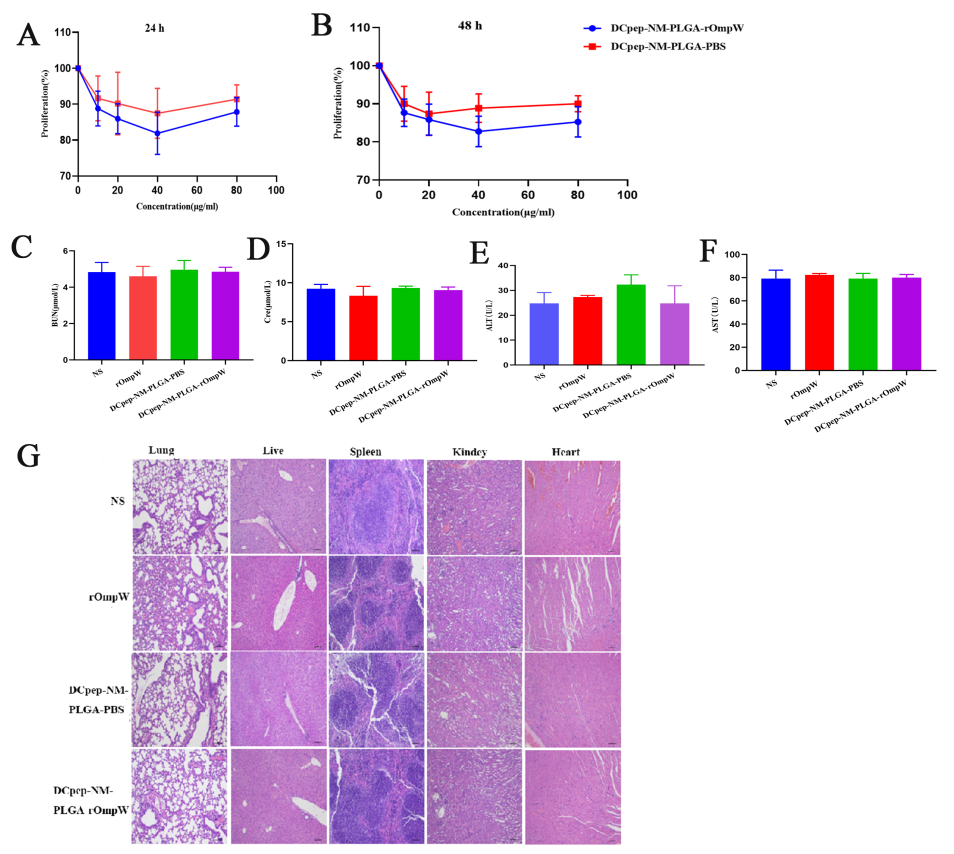


**Fig. S8** Safety evaluation of DCpep-NM-PLGA-rOmpW

**Notes:** Cytotoxicity of DCpep-NM-PLGA-rOmpW and DCpep-NM-PLGA-PBS to A549 cells (A-B). Liver and kidney functions in different groups (C-F). HE staining of major organs (G).
